# Supplementary material
Source: PubMed Central journal article supplement (PMC4138994)
Supplement: jth-12-550-s6.pdf [file jth-12-550-s6.pdf]

**SUPPLEMENTARY TABLE 1.**

| <b>Antibody</b>                                             | <b>Source</b>                           | <b>Address</b>      |
|-------------------------------------------------------------|-----------------------------------------|---------------------|
| Rat anti-mouse CLEC-2                                       | previously described sources<br>[1, 17] |                     |
| Anti-Syk                                                    | previously described sources<br>[1, 17] |                     |
| Anti-PLC $\gamma$ 2                                         | previously described sources<br>[1, 17] |                     |
| Anti-phospho-tyrosine (clone<br>4G10)                       | Millipore                               | Bucks, UK           |
| Anti VASPP-ser239                                           | Cell Signaling Technology               | Herts, UK           |
| Anti VASPP-ser157                                           | Cell Signaling Technology               | Herts, UK           |
| Anti podoplanin-PE<br>conjugated antibody (clone<br>NZ-1.3) | eBioscience                             | Hatfield, UK        |
| Mouse anti CD62P antibody<br>(clone Psel.KO.2.7)            | Novus Biologicals                       | Littleton, CO, USA  |
| Rat anti-mouse CD41<br>antibody (clone MWRReg30)            | BD Pharmingen                           | Oxford, UK          |
| Goat anti rat IgG-Alexa 647                                 | Invitrogen                              | Paisley, UK         |
| Goat anti-mouse IgG-Alexa<br>488                            | Invitrogen                              | Paisley, UK         |
| Anti-mouse<br>HRP-conjugated secondary<br>antibody          | GE Healthcare                           | Bucks, UK           |
| Anti-rabbit<br>HRP-conjugated secondary<br>antibody         | GE Healthcare                           | Bucks, UK           |
| Anti-rat HRP-conjugated                                     | Santa Cruz Biotechnology                | Heidelberg, Germany |

**SUPPLEMENTARY FIGURE 1.**

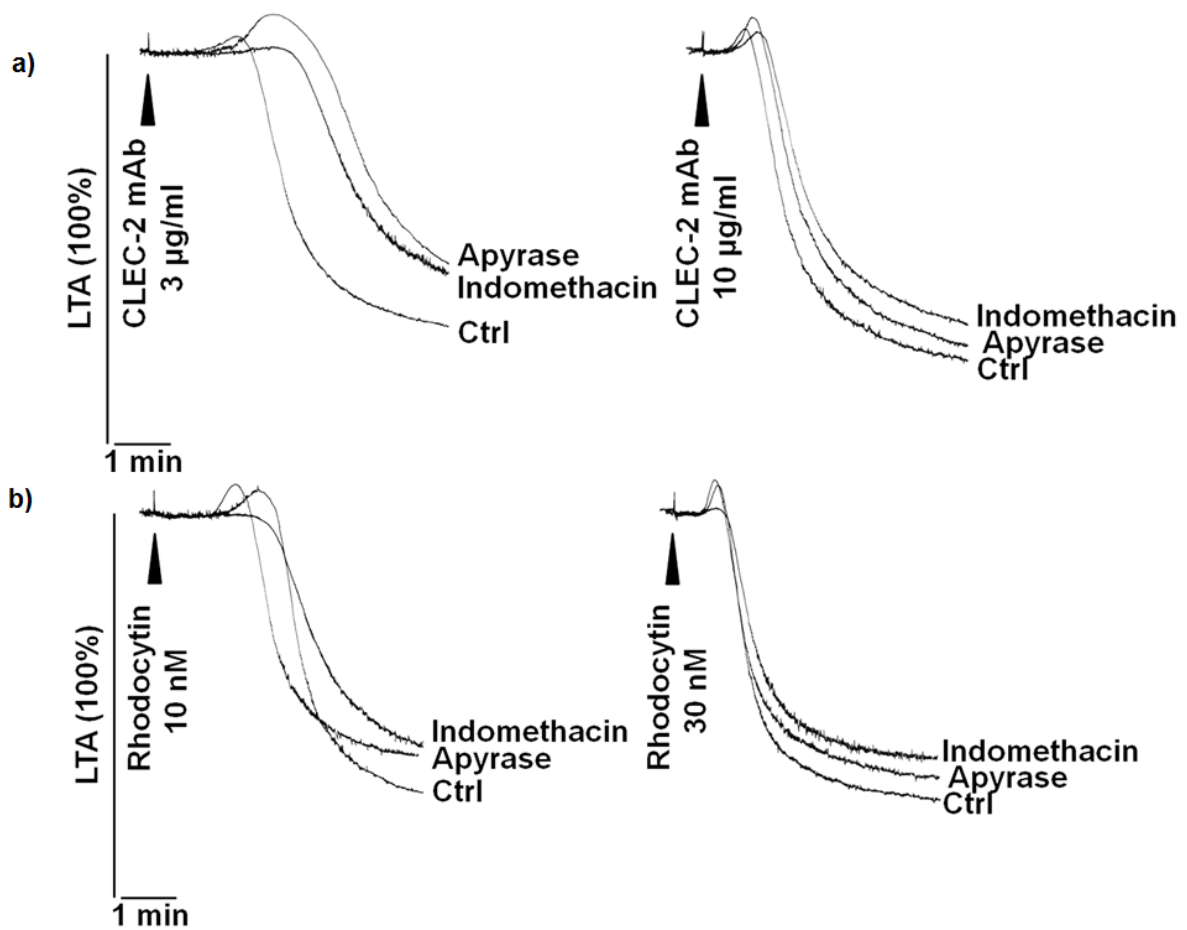

*Marginal effect of apyrase or indomethacin on CLEC-2-dependent platelet aggregation-* The effect of inhibition of the feedback agonists ADP and TxA<sub>2</sub> on CLEC-2-dependent platelet activation was assessed by light transmission aggregometry (LTA) (a, b). Washed platelets (2x10<sup>8</sup>/ml) were stimulated with CLEC-2 mAb (a) or rhodocytin (b) in the presence and in the absence of 2 U/ml apyrase or 10 µM indomethacin and allowed to aggregate. Representative traces with 3-10 µg/ml CLEC-2 mAb and 10-30 nM rhodocytin are shown.

**SUPPLEMENTARY FIGURE 2.**

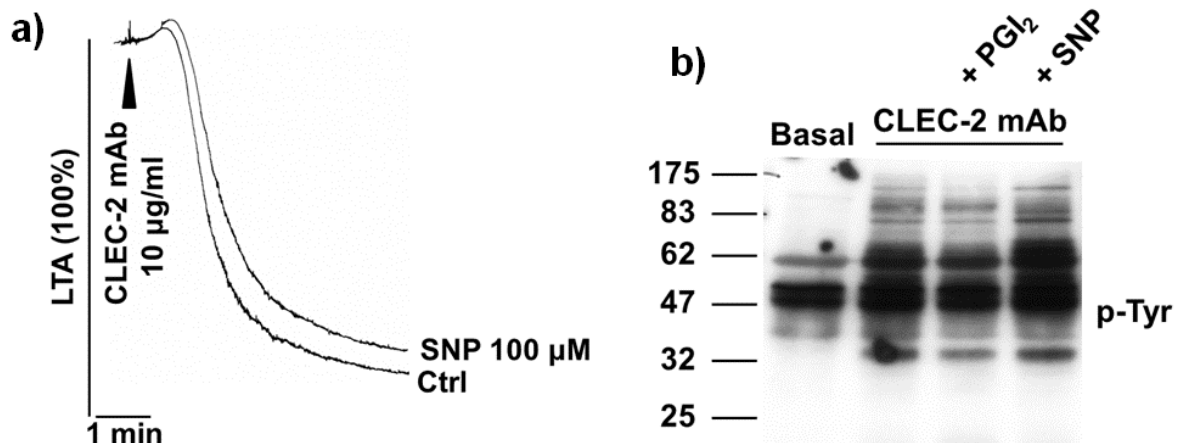

*Lack of effect of SNP on CLEC-2-dependent platelet aggregation and tyrosine phosphorylation-* The effect of SNP (100 µM) on CLEC-2 mAb-dependent platelet aggregation (a) and tyrosine phosphorylation (b) was studied. Washed platelets ( $2 \times 10^8$ /ml) were treated as indicated for 3 minutes prior to activation with mAb and allowed to aggregate (a). Washed platelets ( $4 \times 10^8$ /ml) treated with of apyrase (2 U/ml), indomethacin (10 µM) and lotrafiban (10 µM) were added with SNP (100 µM) in comparison with PGI<sub>2</sub> (1 µM) and stimulated with 10 µg/ml CLEC-2 mAb for 3 minutes prior to lysis. Aliquots were analysed by SDS-PAGE and blots were probed with anti phospho-tyrosine monoclonal antibody (clone 4G10) (b).

**SUPPLEMENTARY FIGURE 3.**

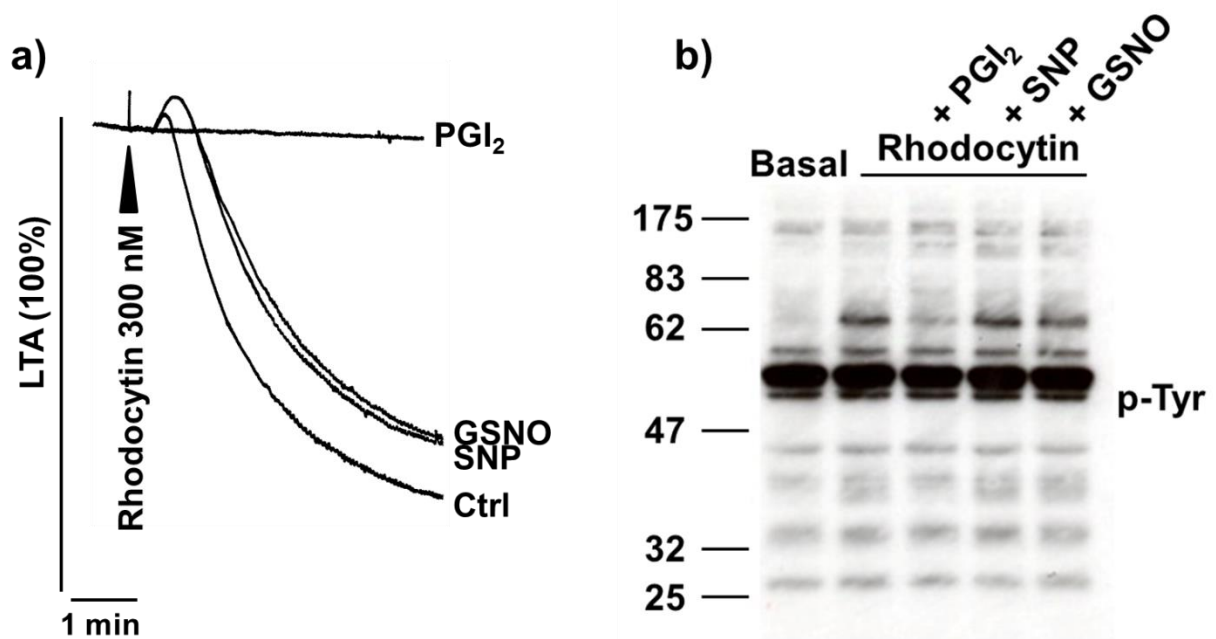

*Effect of cyclic nucleotide-elevation on CLEC-2-dependent platelet aggregation and tyrosine phosphorylation in human platelets-* The effect of PGI<sub>2</sub> (0.1  $\mu$ M), GSNO and SNP (100  $\mu$ M) on rhodocytin-induced platelet aggregation (a) and tyrosine phosphorylation (b) was studied. Washed platelets ( $2 \times 10^8$ /ml) were treated as indicated for 3 minutes prior to activation with mAb and allowed to aggregate (a). Washed platelets ( $5 \times 10^8$ /ml) treated with apyrase (2 U/ml), indomethacin (10  $\mu$ M) and lotrafiban (10  $\mu$ M) were treated with PGI<sub>2</sub> (1  $\mu$ M), GSNO or SNP (100  $\mu$ M) and stimulated with 300nM rhodocytin for 3 minutes prior to lysis. Aliquots were analysed by SDS-PAGE and blots were probed with anti phospho-tyrosine monoclonal antibody (clone 4G10) (b).

**SUPPLEMENTARY FIGURE 4.**

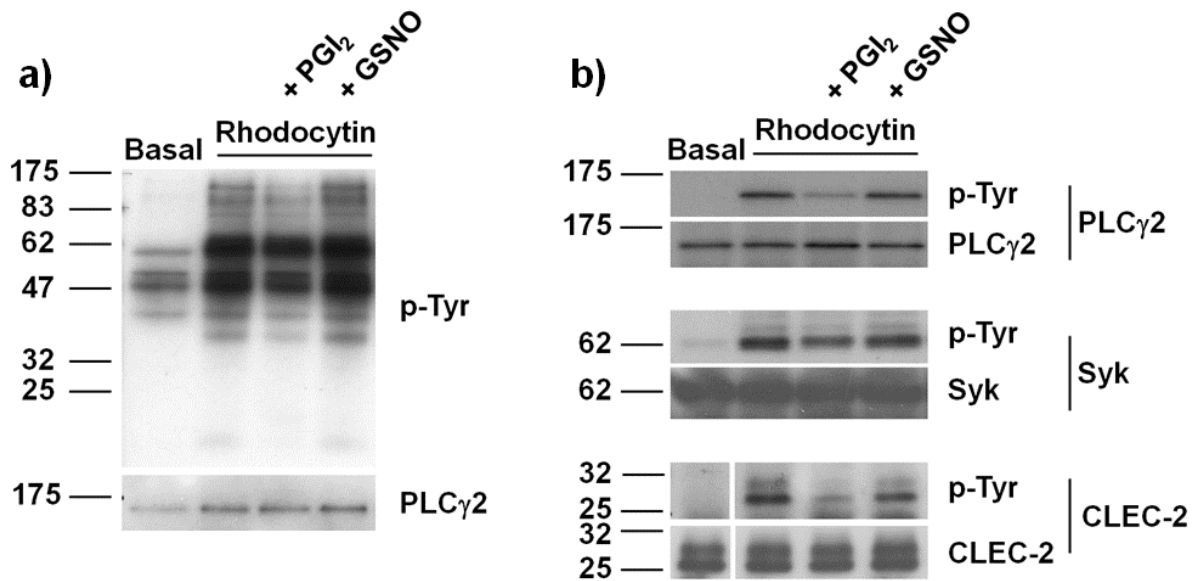

*Rhodocytin-dependent tyrosine phosphorylation is partially reduced by cyclic nucleotide-elevation-* The effect of cyclic nucleotide-elevation on rhodocytin-dependent tyrosine phosphorylation was assessed by use of PGI $_2$  (2  $\mu$ M) and GSNO (100  $\mu$ M) in the presence of apyrase (2 U/ml), indomethacin (10  $\mu$ M) and lotrafiban (10  $\mu$ M). Washed platelets ( $4 \times 10^8$ /ml) were stimulated with 30 nM rhodocytin for 3 minutes and lysed with NP40 detergent. (a) Aliquots were analysed by SDS-PAGE and (b) the remaining was used to immunoprecipitate PLC $\gamma$ 2, Syk and CLEC-2. Results are representative of 3 experiments. Blots were probed with anti phospho-tyrosine monoclonal antibody (clone 4G10) (a&b) and reprobed for equal loading control. The total CLEC-2 blot was obtained by running in parallel 25% of the sample.

SUPPLEMENTARY FIGURE 5.

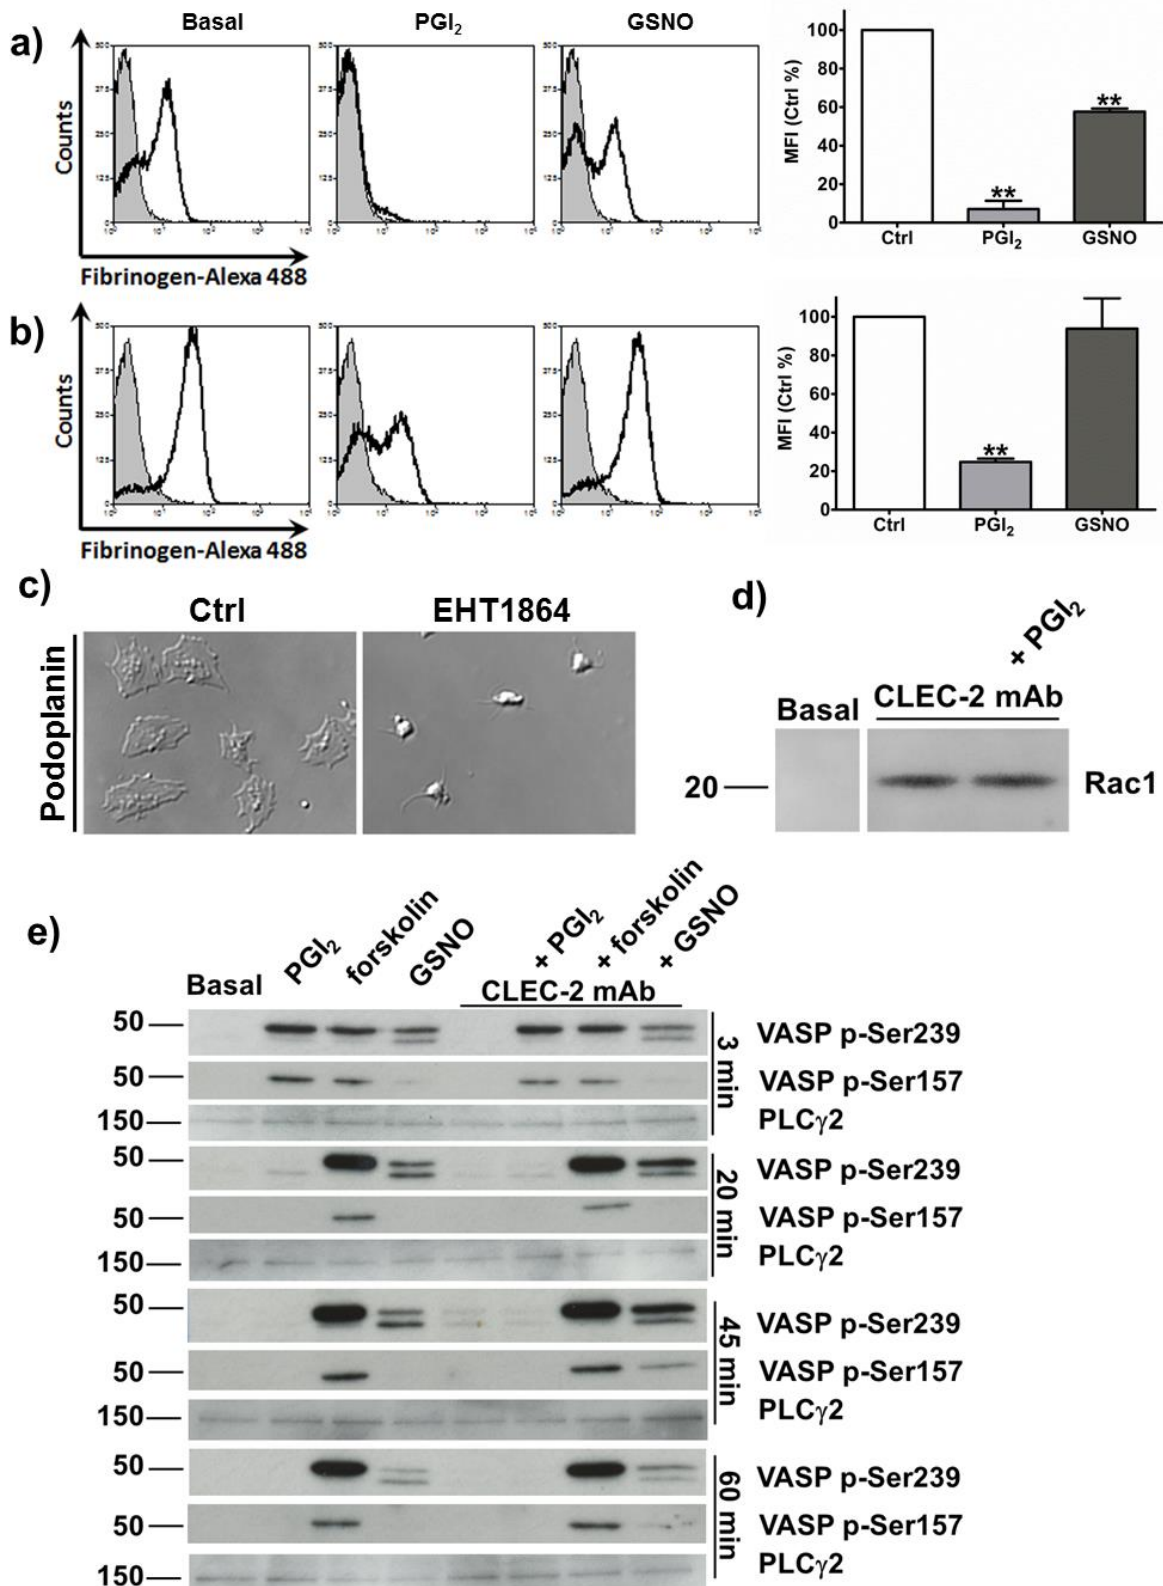

*cAMP and cGMP have differential effects on different platelet pathways* - Washed platelets ( $2 \times 10^7$ /ml) were pre-incubated for 3 min with the stated concentrations of PGI<sub>2</sub>, GSNO or vehicle and stimulated with 10 µg/ml CLEC-2 mAb for 3 min (a) and 45 min (b) at 37°C in the presence of 60 µg/ml Alexa-Fluor-488-labelled fibrinogen. Incubations were fixed by addition of ice cold 1% formaldehyde and analysed in a FACScalibur flow cytometer using Cell-Quest software (BD Biosciences, Oxford, UK). Representative traces are shown. Mean fluorescence intensity values were plotted after subtraction of the unstimulated control levels and plotted as mean ± SEM (n=3). Statistical difference was evaluated by one way ANOVA test and Dunnet's post test (\*\*p<0.01).

$2 \times 10^7$ /ml washed platelets were treated with EHT1864 (50µM), before spreading on podoplanin-coated coverslips (10µg/ml). Coverslips were fixed, mounted and imaged as described in Figure 4 (c). A suspension of platelets ( $10^9$ /ml) was activated by CLEC-2 mAb (10µg/ml) for 45 min in the presence or absence of 1µM PGI<sub>2</sub> and Rac activation was studied by GTP-Rac pull down assay using a commercially available kit according to manufacturer's instructions. A positive control for Rac activation was prepared by incubating platelets in parallel with GTPγS as specified in the kit manual (not shown). Pulled down beads were analyzed by SDS-PAGE (10%) and blots were probed for Rac1(d) (n=3).

Washed platelets ( $4 \times 10^8$ /ml) were activated with 10 µg/ml CLEC-2 mAb in the presence or absence of PGI<sub>2</sub> (1µM) or GSNO (1mM) and lysed after 3, 20, 45 or 60 min with 5x Laemmli sample buffer. Aliquots were analysed by SDS-PAGE prior to probing with anti VASP p-Ser239. The antibody was then stripped and the membranes reprobed for VASP p-Ser157 and PLCγ2 for loading control (n=2).
